# Supplementary material for: 5-Hydroxymethylcytosine-selective oxidation with peroxotungstate
Source: Royal Society of Chemistry journal article supplement (doi:10.1039/c1cc14782j), 2011-01-01
Supplement: c1cc14782j.pdf [file c1cc14782j.pdf]

## Supporting Information

### 5-Hydroxymethylcytosine-selective oxidation with peroxotungstate

Akimitsu Okamoto,<sup>1,2,\*</sup> Kaori Sugizaki,<sup>1</sup> Akiko Nakamura,<sup>1</sup> Hiroyuki Yanagisawa,<sup>1</sup> Shuji Ikeda<sup>1</sup>

<sup>1</sup>Advanced Science Institute, RIKEN, Wako, Saitama 351-0198, Japan, <sup>2</sup>PRESTO, Japan Science and Technology

Agency, 4-1-8 Honcho, Kawaguchi, Saitama 332-0012, Japan

## Experimental Section

**Preparation of <sup>hm</sup>C-containing DNA.** Artificial DNA was synthesized using the conventional phosphoramidite method employing an NTS H-6 DNA/RNA synthesizer. The phosphoramidite of <sup>hm</sup>C was prepared according to a previously reported protocol (K. Sugizaki, S. Ikeda, H. Yanagisawa and A. Okamoto, *Org. Biomol. Chem.*, 2011, **9**, 4176). The synthesized DNA was purified using reversed-phase HPLC on a 5-ODS-H column (10 × 150 mm, elution with a solvent mixture of 0.1 M triethylammonium acetate (pH = 7.0), linear gradient over 20 min from 5% to 20% acetonitrile at a flow rate of 3.0 mL/min).

**Metal oxidation and hot piperidine treatment.** The dinuclear peroxotungstate (**1**) and dinuclear peroxomolybdate were prepared according to the reported synthetic procedures (K. Kamata, K. Yamaguchi, N. Mizuno, *Chem.–Eur. J.*, 2004, **10**, 4728; N. J. Campbell, A. C. Dengel, C. J. Edwards and W. P. Griffith, *J. Chem. Soc. Dalton Trans.*, 1989, 1203). The fluorescein-labeled DNA (5 μM) to be examined was incubated in a solution of 5 mM of the

metal complex (plus 50 mM hydrogen peroxide as an option) and 100 mM sodium chloride in 50 mM sodium phosphate (pH = 7.0) at 50 °C for 5 h. The reaction solution was filtered to deionize it using Micro Bio-Spin Columns with Bio-Gel P-6 (Bio-Rad). After drying *in vacuo*, the precipitated DNA was redissolved in 50 µL of 10% piperidine (*v/v*), heated at 90 °C for 2 h, and then evaporated to dryness using a vacuum rotary evaporator.

**Tungsten oxidation of d<sup>hm</sup>C.** The oxidant **1** (128 mg, 195 µmol) and 30% hydrogen peroxide (45 µL) were added to a solution of d<sup>hm</sup>C (100 mg, 389 µmol) in water (1 mL) at 50 °C for 24 h. After the mixture had cooled to room temperature, the precipitated inorganic salt was removed by centrifugation and decantation. After purification using reversed-phase HPLC (3% to 10% acetonitrile in 0.1 M triethylammonium acetate, pH = 7.0), the collected fractions were evaporated to dryness under reduced pressure. The residue was dissolved in methanol and diethyl ether was added to the solution to give a white precipitate. The precipitate was washed with diethyl ether and dried to obtain the product as a white powder (28 mg, 22%), which was a mixture of diastereomeric isomers with the same molecular weight. The product was analyzed using ESI mass spectrometry (Fig. S2 and S3), <sup>1</sup>H NMR spectroscopy (Fig. S4), and <sup>13</sup>C NMR spectroscopy (Fig. S5). HRMS (ESI) [M + Na]<sup>+</sup>, C<sub>10</sub>H<sub>16</sub>N<sub>2</sub>O<sub>8</sub>Na, calcd. 315.0804, found 315.0814; <sup>1</sup>H NMR (500 MHz, DMSO-*d*<sub>6</sub>) of the major isomer, δ 10.39 (m, 1H, NH), 6.30 (d, 1H, 6-OH, *J*<sub>OH-6H</sub> = 5.0 Hz), 6.06 (dd, 1H, 1'-H, *J*<sub>1'H-2'H</sub> = 6.0 Hz, *J*<sub>1'H-2''H</sub> = 8.5 Hz), 5.42 (s, 1H, 5'-OH), 5.11 (d, 1H, 3'-OH, *J*<sub>OH-3'H</sub> = 4.0 Hz), 4.82 (d, 1H, 6-H, *J*<sub>6H-OH</sub> = 5.0 Hz), 4.78 (t, 1H, CH<sub>2</sub>-OH, *J*<sub>CH<sub>2</sub>-OH</sub> = 5.5 Hz), 4.12 (m, 1H, 4'-H), 3.60 (m, 1H, 3'-H), 3.41 (m, 4H, 5'-CH<sub>2</sub> and CH<sub>2</sub>-OH), 2.18 (m, 2H, 2'-CH<sub>2</sub> (β)), and 1.82 (m, 2H, 2'-CH<sub>2</sub> (α)); the minor isomer, δ 10.37 (m, 1H, NH), 6.02 (t, 1H, 1'-H, *J*<sub>1'H-2'H</sub> = 6.5 Hz), 5.92 (d, 1H, 6-OH, *J*<sub>OH-6H</sub> = 4.0

Hz), 5.35 (s, 1H, 5'-OH), 5.17 (d, 1H, 3'-OH,  $J_{\text{OH}-3'\text{H}} = 4.5$  Hz), 4.91 (d, 1H, 6-H,  $J_{6\text{H}-\text{OH}} = 4.0$  Hz), 4.90 (t, 1H,  $\text{CH}_2\text{-OH}$ ,  $J_{\text{OH}-\text{CH}_2} = 6.5$  Hz), 4.16 (m, 1H, 4'-H), 3.57 (m, 1H, 3'-H), 3.49 (m, 2H, 5'-CH<sub>2</sub>), 3.44 (m, 2H,  $\text{CH}_2\text{-OH}$ ), 2.12 (m, 2H, 2'-CH<sub>2</sub> ( $\beta$ )), and 1.80 (m, 2H, 2'-CH<sub>2</sub> ( $\alpha$ )); <sup>13</sup>C NMR (125 MHz, DMSO-*d*<sub>6</sub>) of the major isomer,  $\delta$  172.3 (4-C=O), 151.8 (2-C=O), 86.0 (4'-CH), 83.3 (1'-CH), 76.3 (5-C), 76.2 (6-CH), 70.9 (3'-CH), 65.1 (5'-CH<sub>2</sub>), 62.2 ( $\text{CH}_2\text{-OH}$ ), 36.9 (2'-CH); the minor isomer,  $\delta$  172.5 (4-C=O), 152.4 (2-C=O), 85.9 (4'-CH), 83.9 (1'-CH), 76.6 (5-C), 75.5 (6-CH), 69.7 (3'-CH), 64.9 (5'-CH<sub>2</sub>), 60.7 ( $\text{CH}_2\text{-OH}$ ), 38.4 (2'-CH).

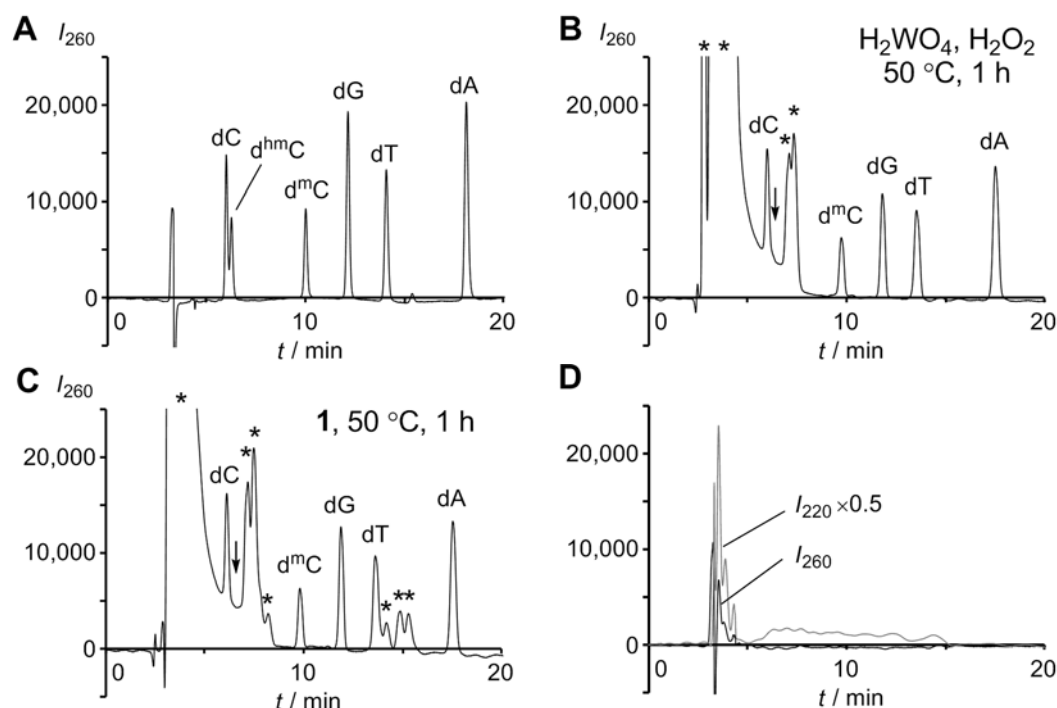

**Fig. S1** HPLC profiles of nucleosides before and after tungsten oxidation. The nucleotides were analysed using reverse phase HPLC on a 5-ODS-H column (10 × 150 mm, elution carried out using a solvent mixture of 0.1 M triethylammonium acetate (pH = 7.0), and a linear gradient over 20 min from 3% to 10% acetonitrile). Profile A: Before oxidation. Profile B: Treatment with tungstic acid and hydrogen peroxide. Profile C: Treatment with **1**. The signal from d<sup>hm</sup>C disappeared (denoted by the arrow). The asterisks denote the signals originating from degradation of oxidants. Profile D shows the reaction products from d<sup>hm</sup>C (black = 260 nm monitoring, and gray = 220 nm monitoring).

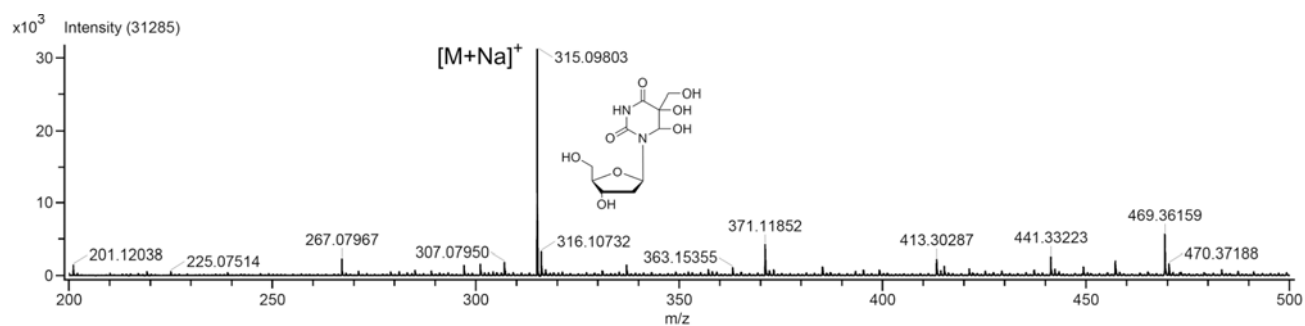

**Fig. S2** ESI mass spectrum of the peroxotungstate **1** oxidation products of d<sup>hm</sup>C. The sodium salt of trihydroxylated dT is shown in the figure inset.

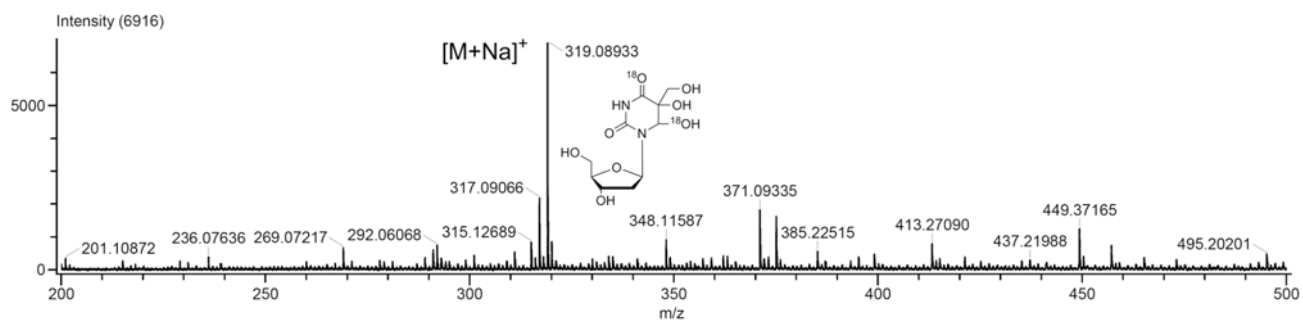

**Fig. S3** ESI mass spectrum of the peroxotungstate **1** oxidation products of  $d^{hm}C$  (Oxidation in 90%  $H_2^{18}O$ ). The sodium salt of trihydroxylated dT ( $2^{18}O$ ) is shown in the figure inset.

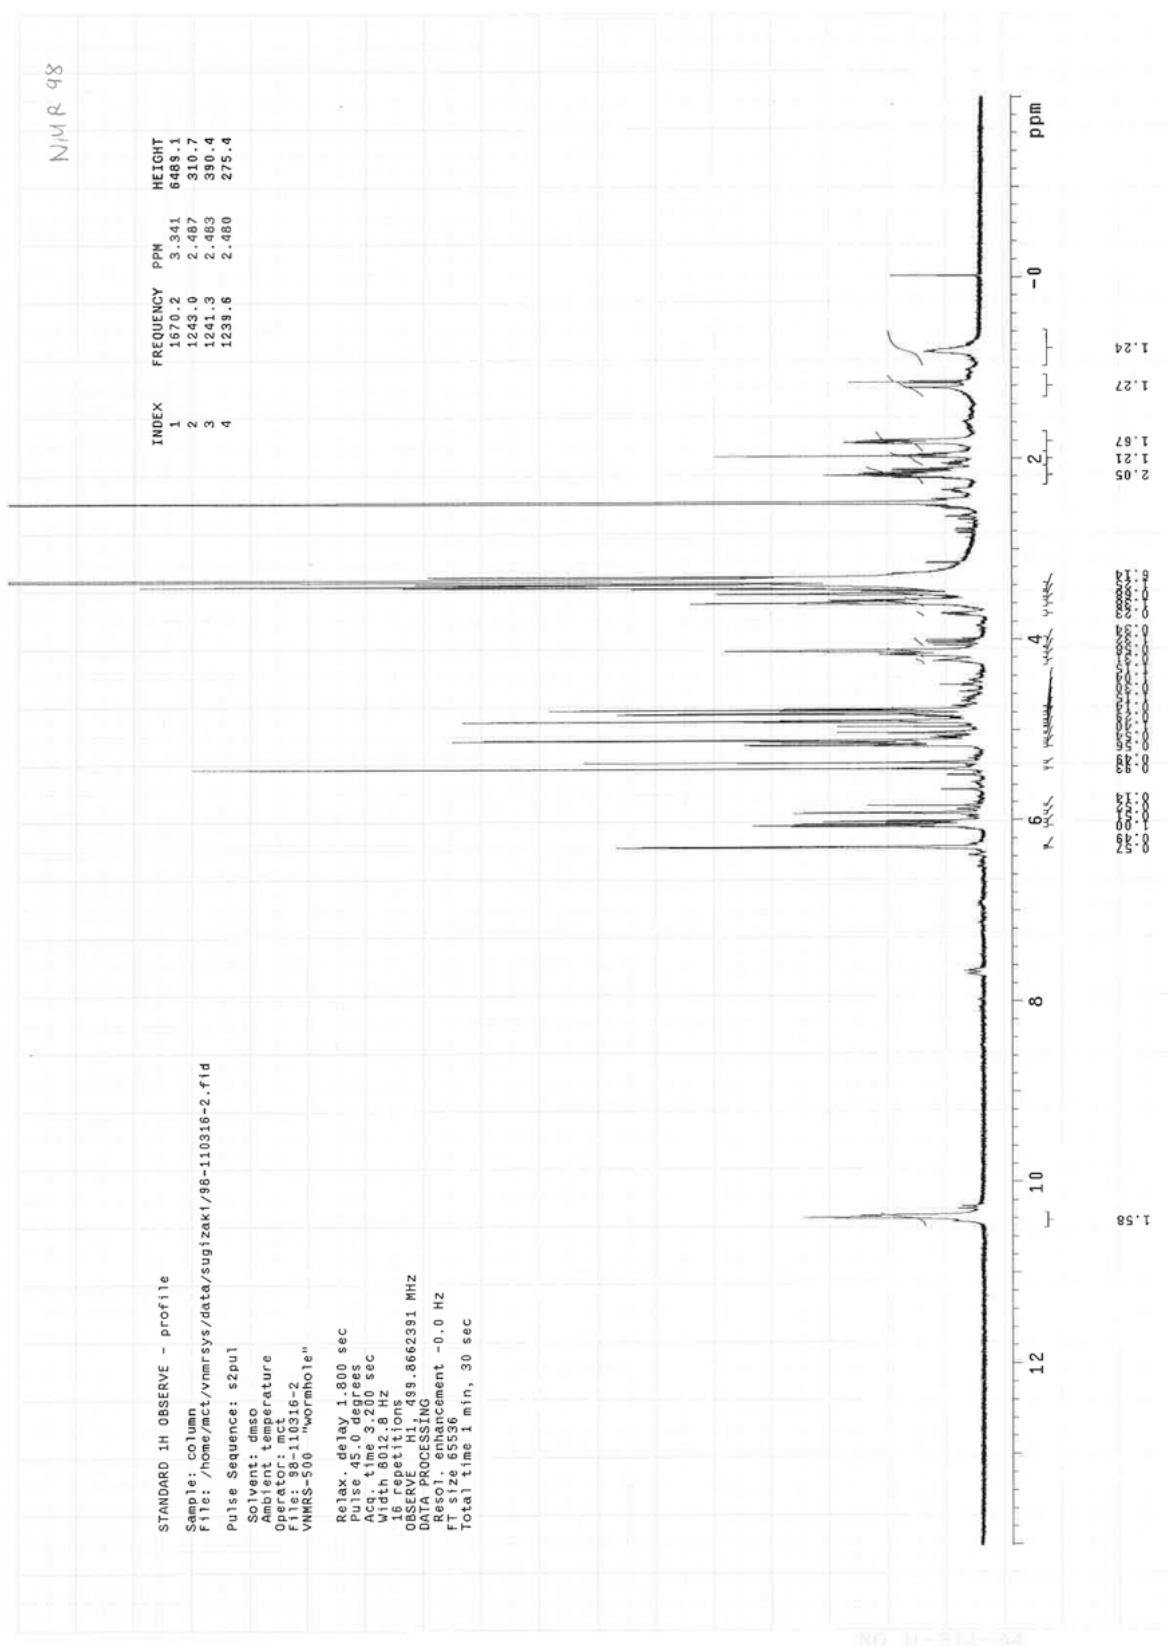

**Fig. S4**  $^1\text{H}$  NMR spectra of the peroxotungstate **1** oxidation products of  $\text{d}^{13}\text{C}$ .

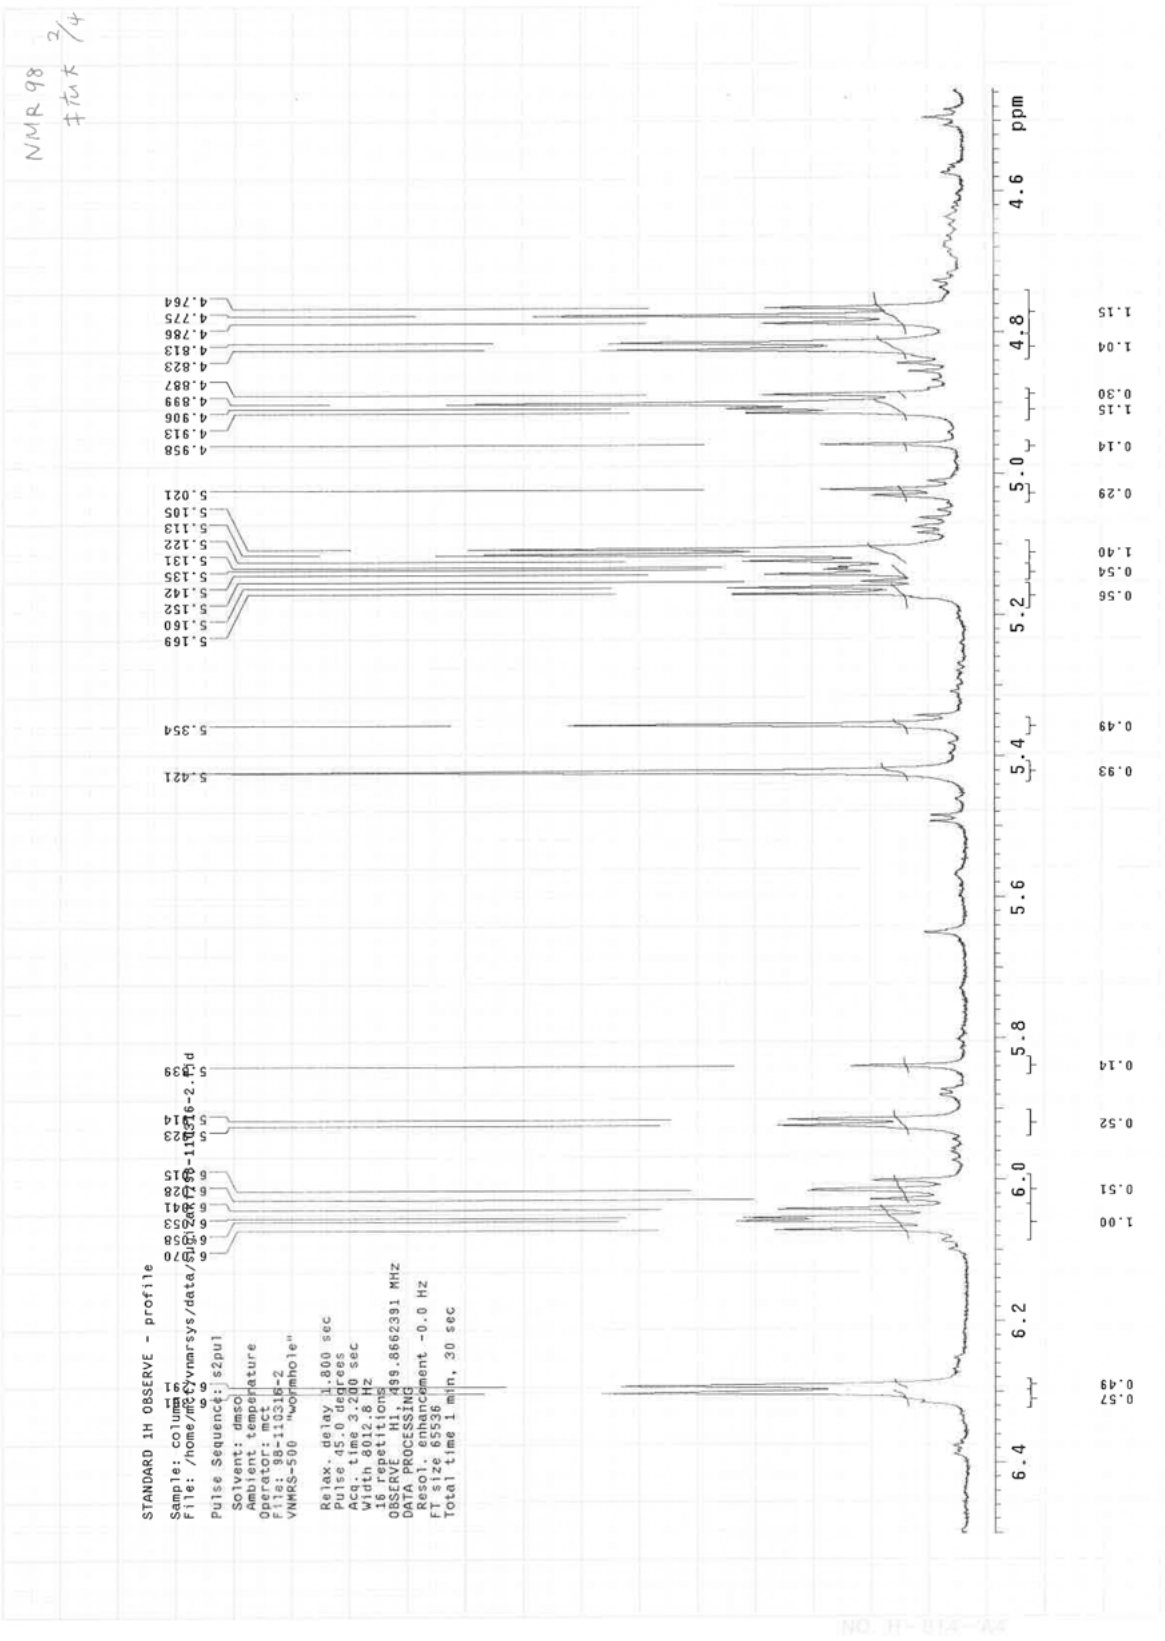

Fig. S4 (continued).

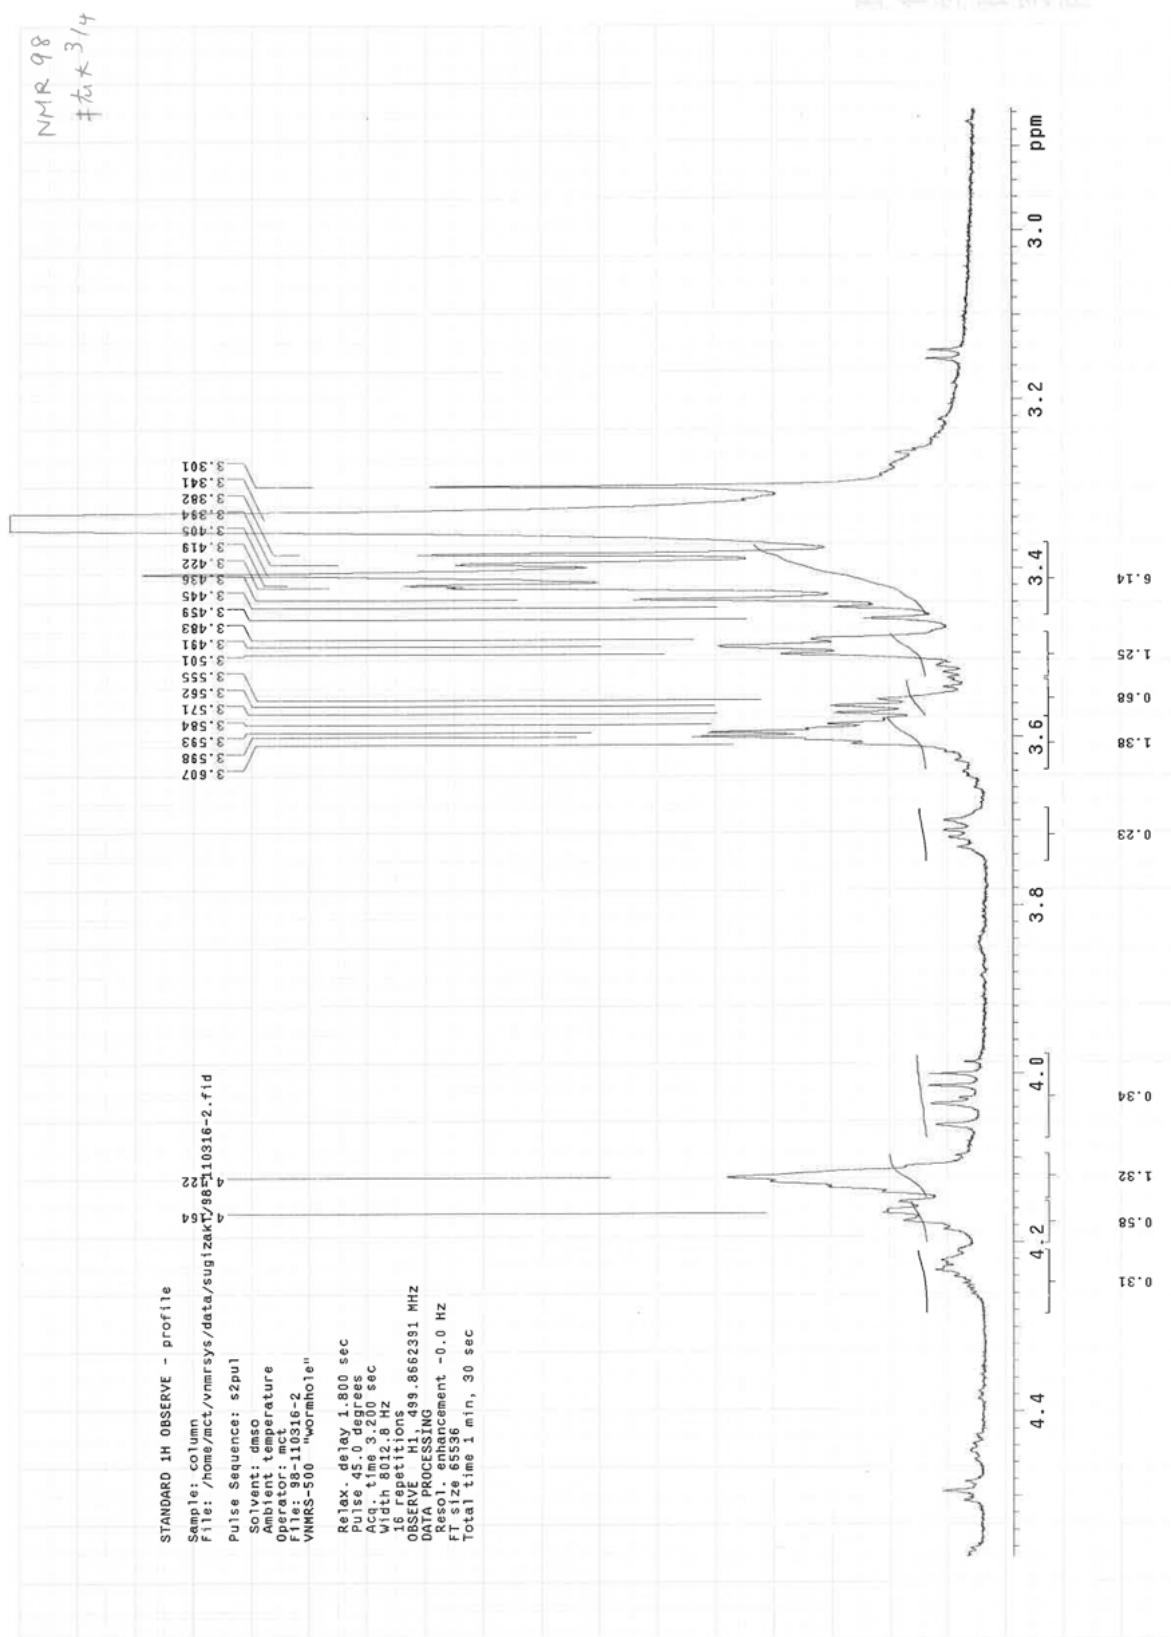

Fig. S4 (continued).

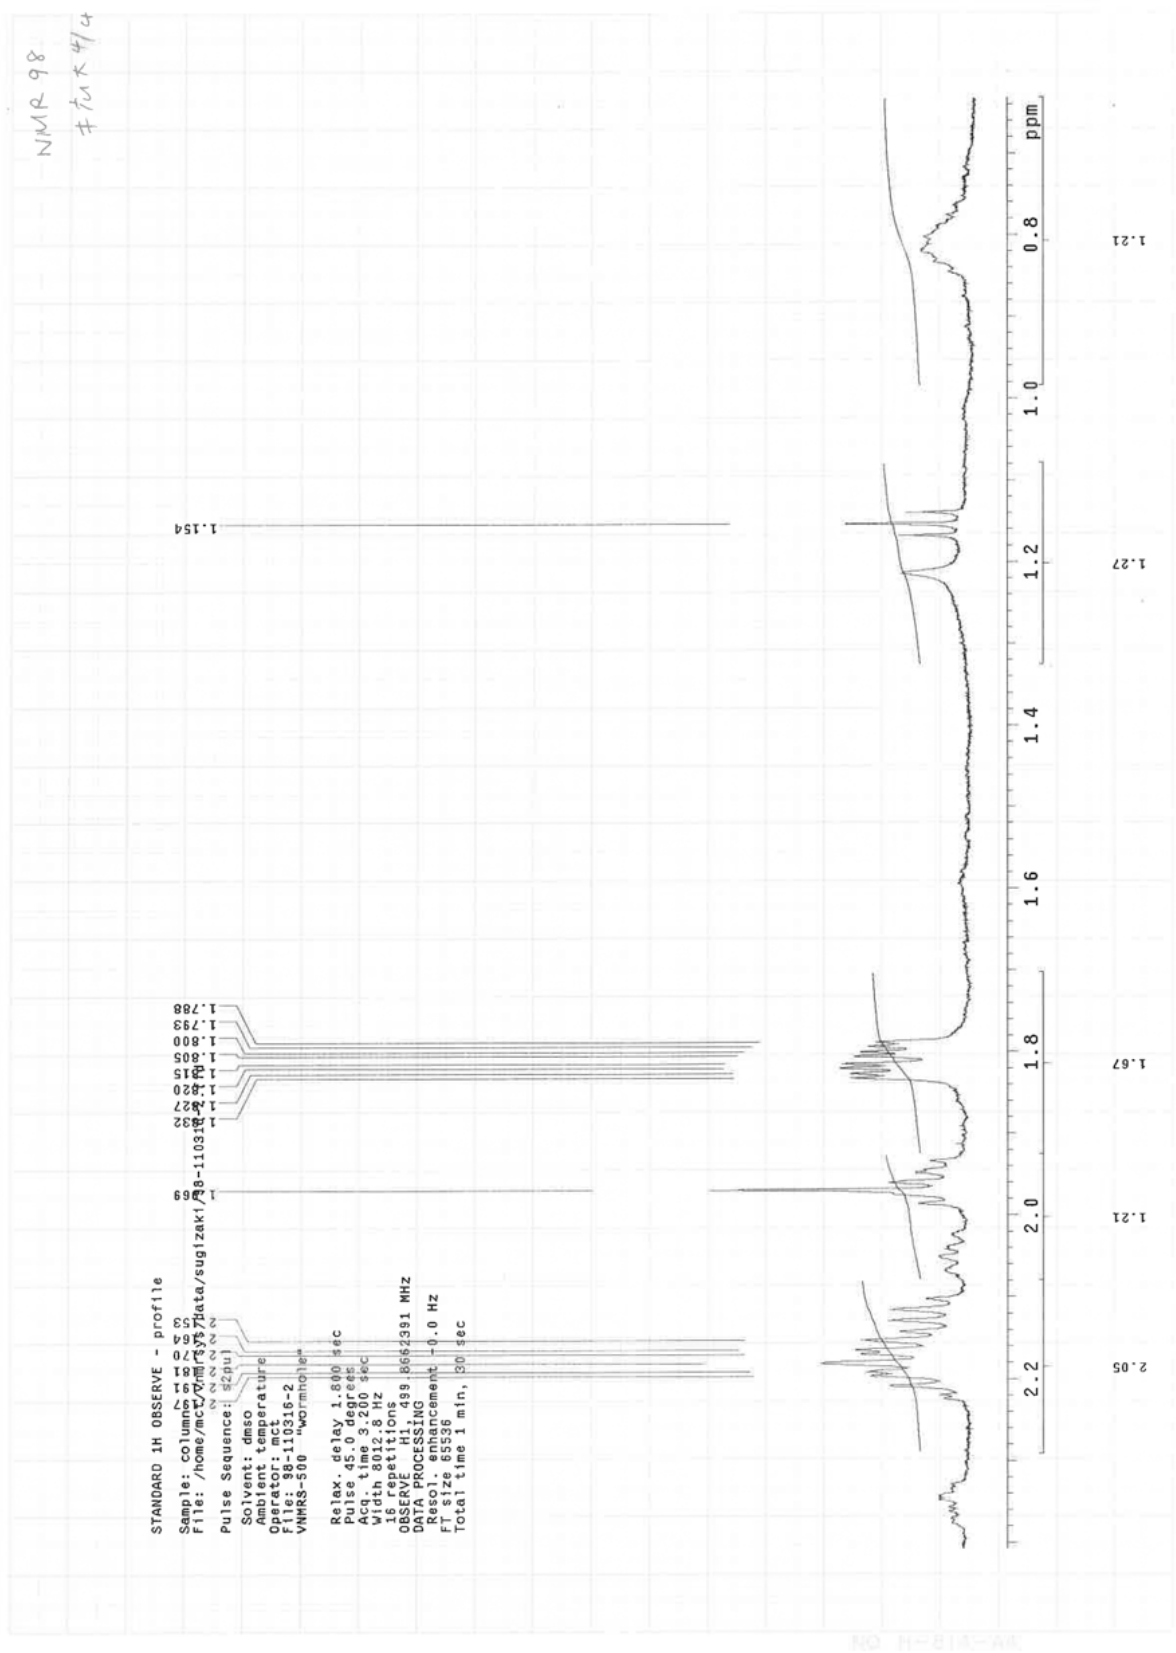

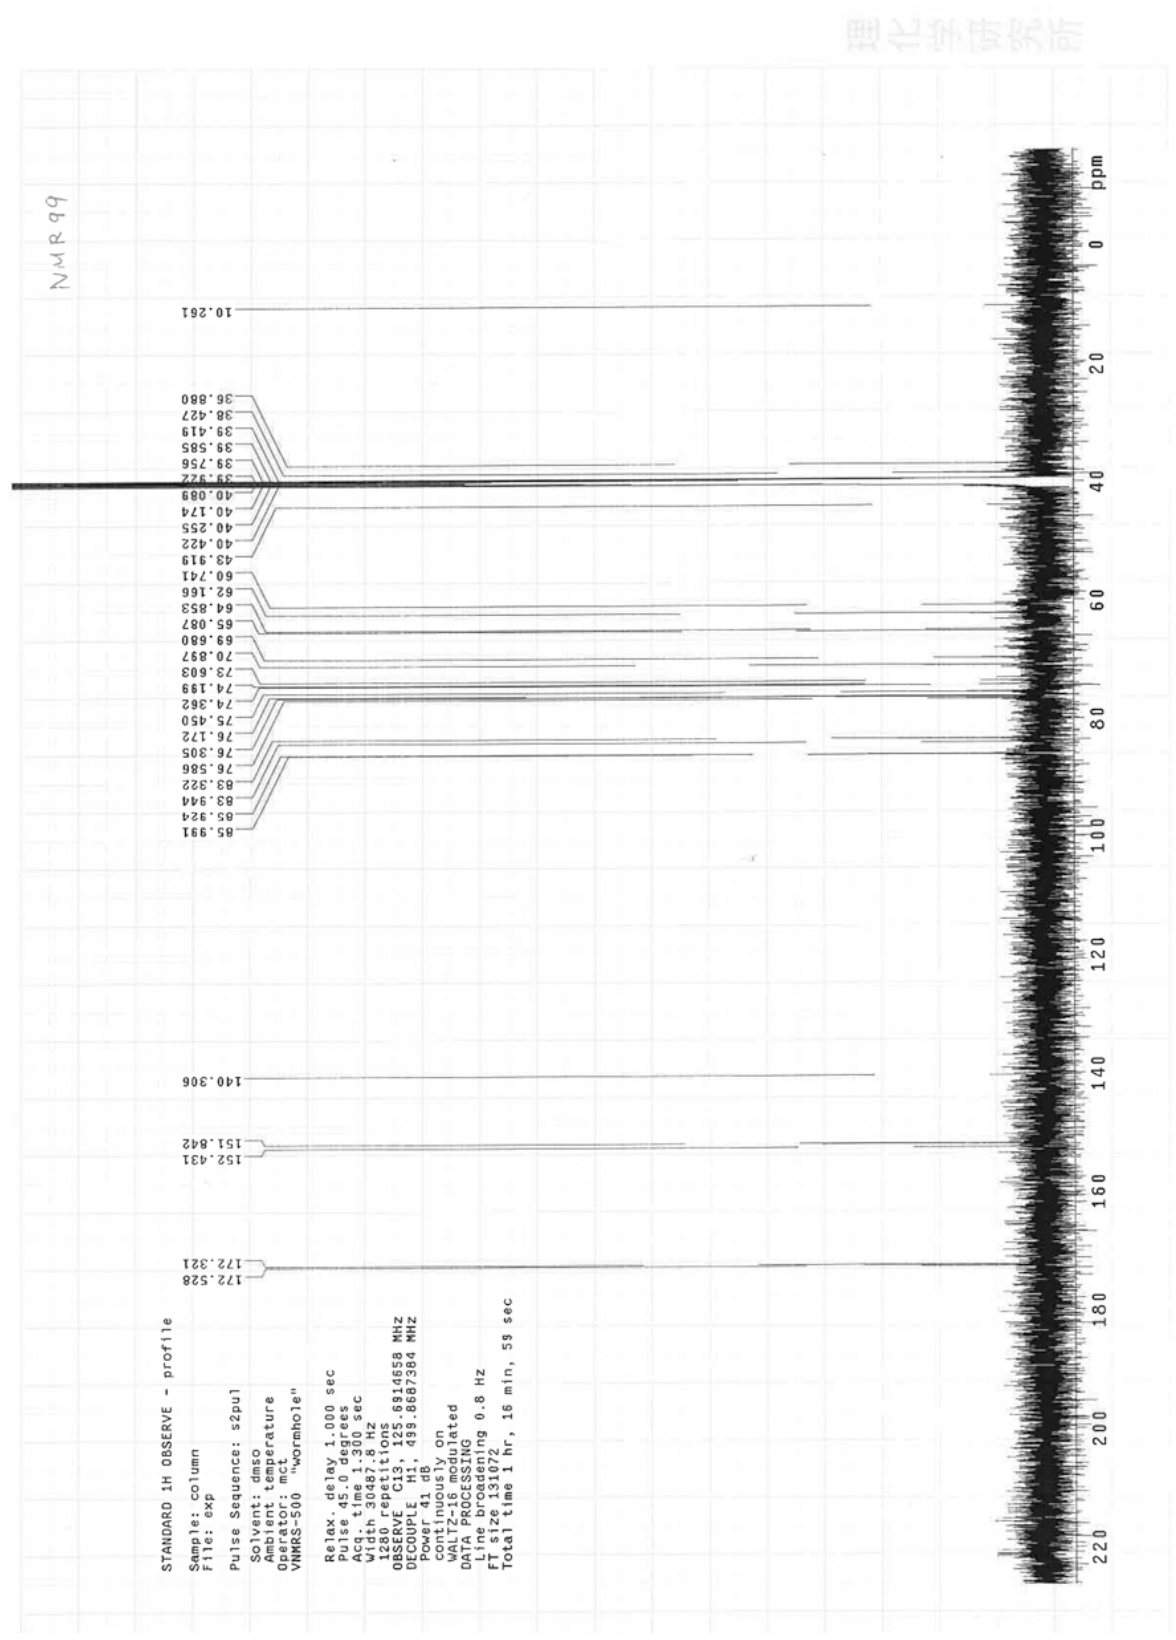

Fig. S5 <sup>13</sup>C NMR spectra of the peroxotungstate **1** oxidation products of d<sup>13</sup>C.

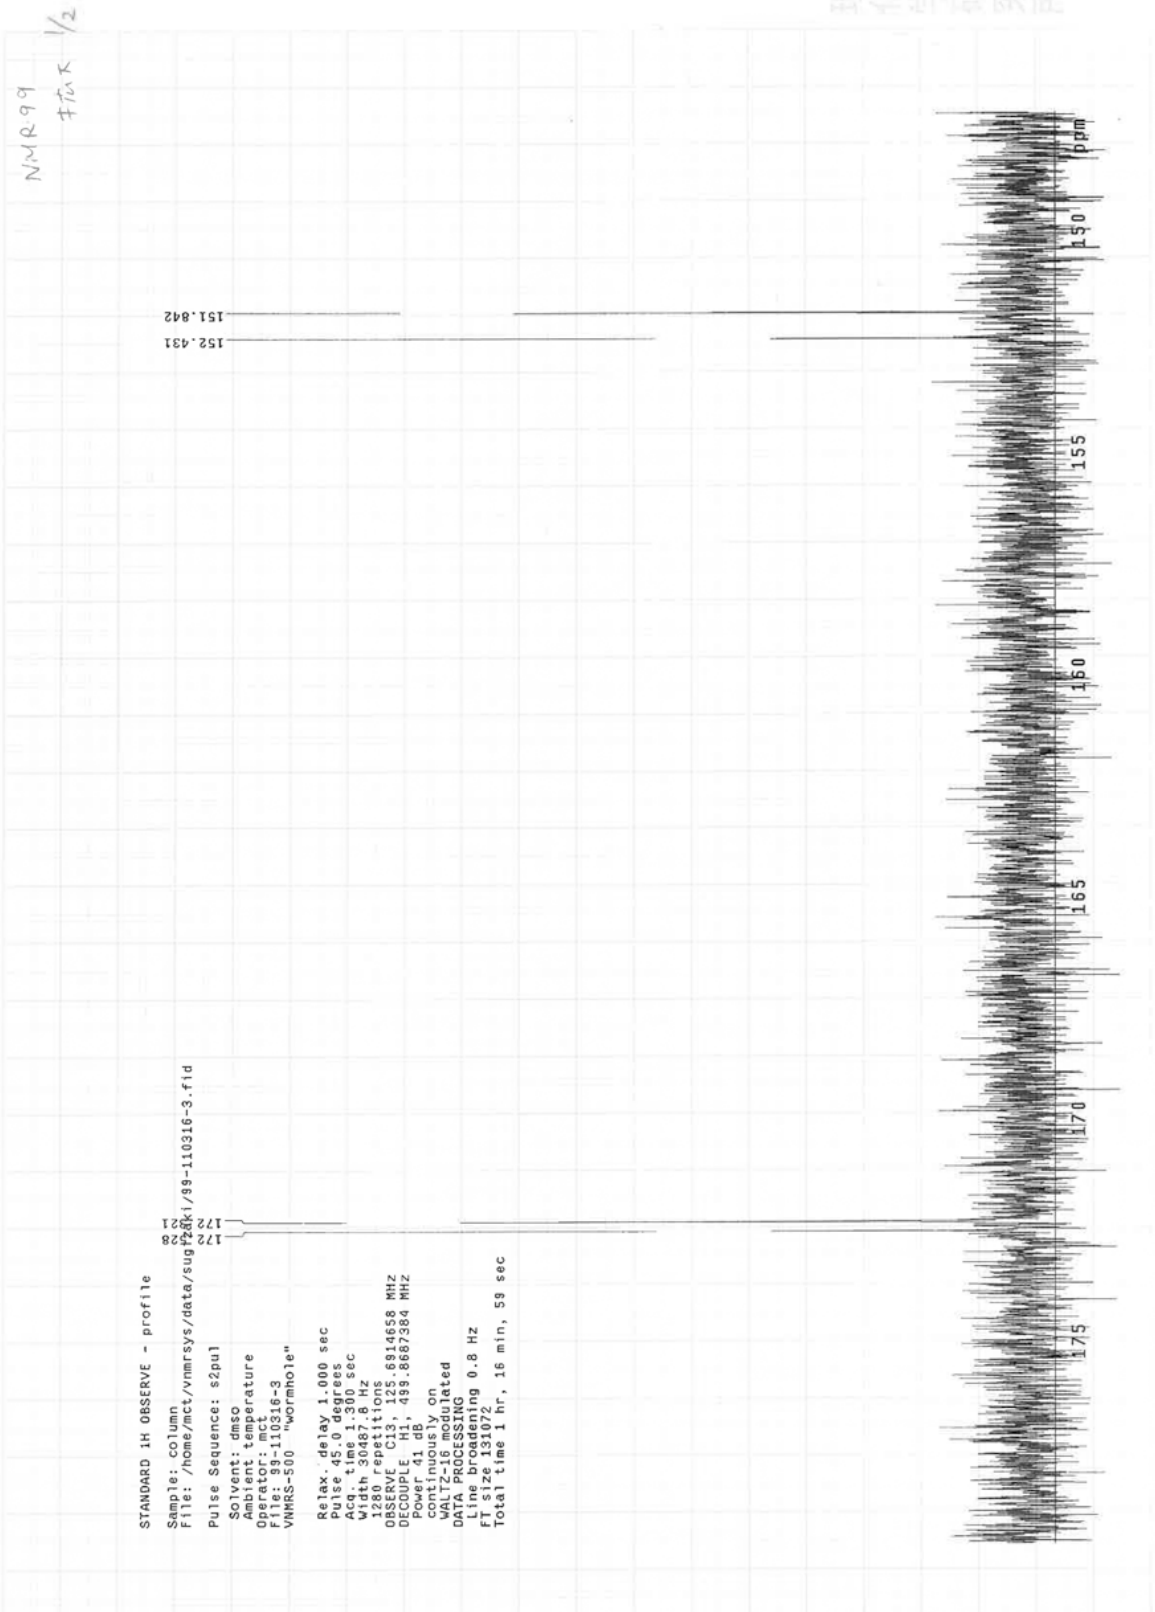

Fig. S5 (continued).

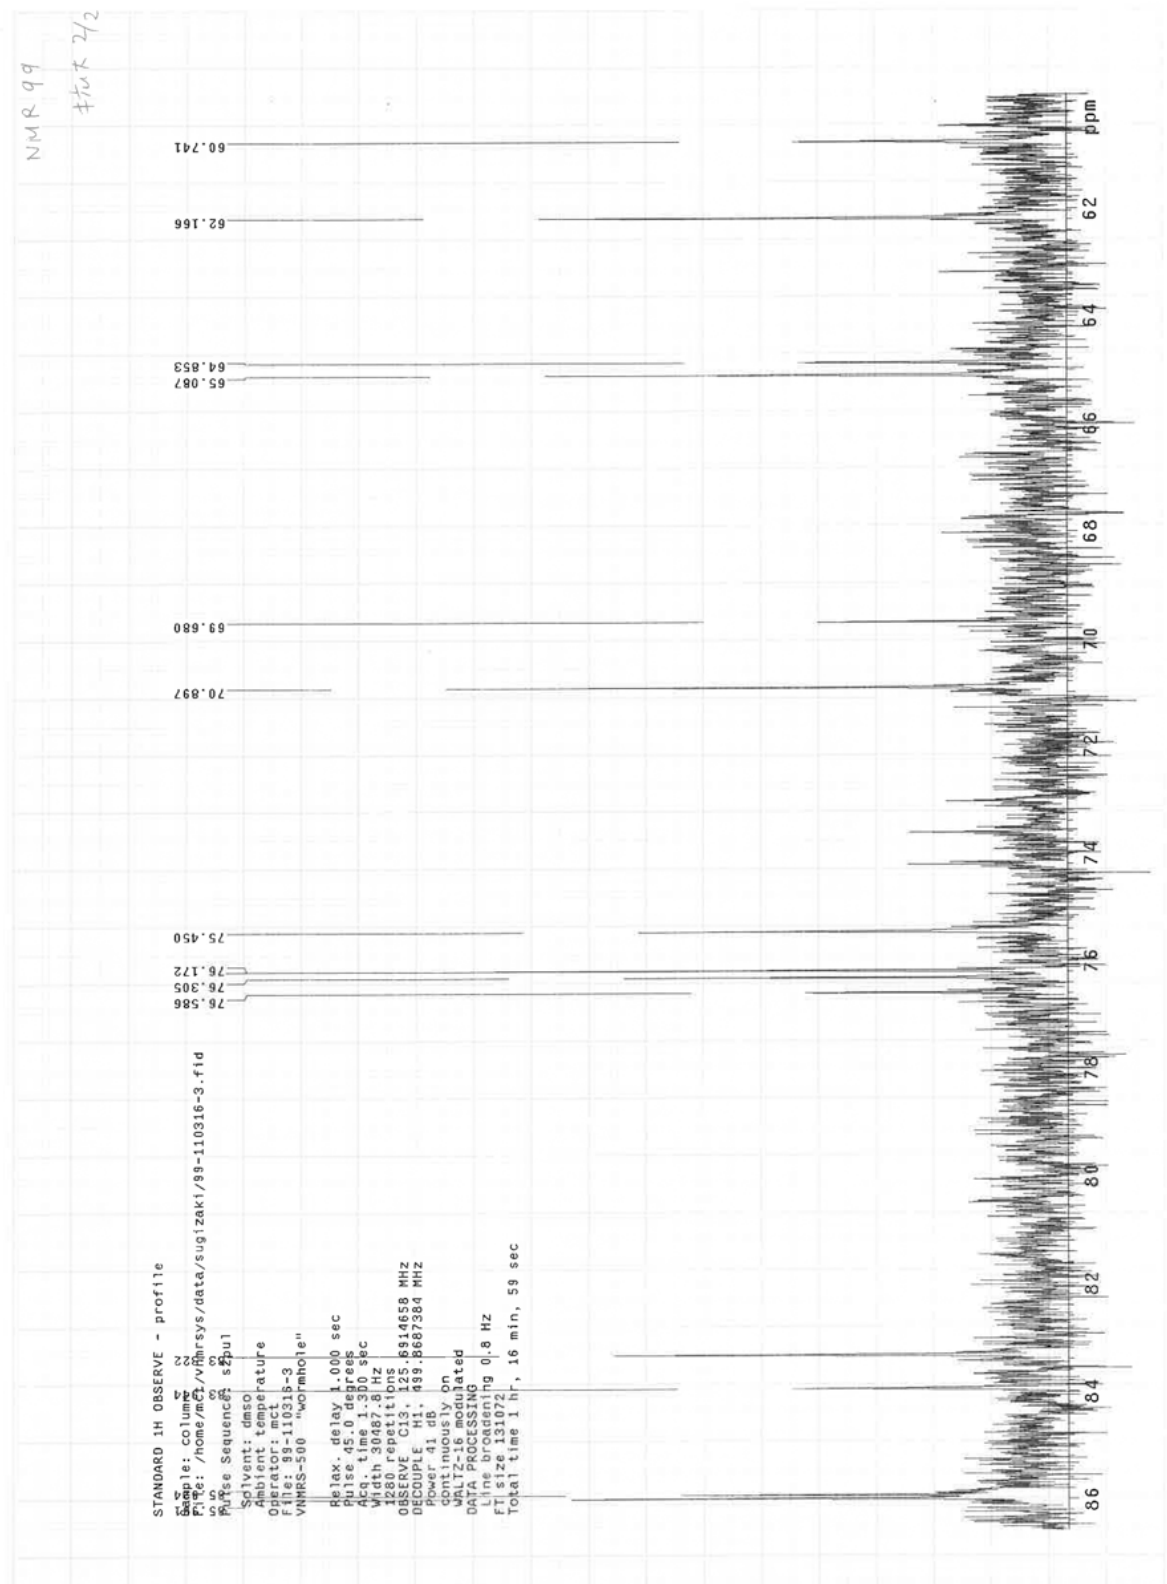

Fig. S5 (continued).

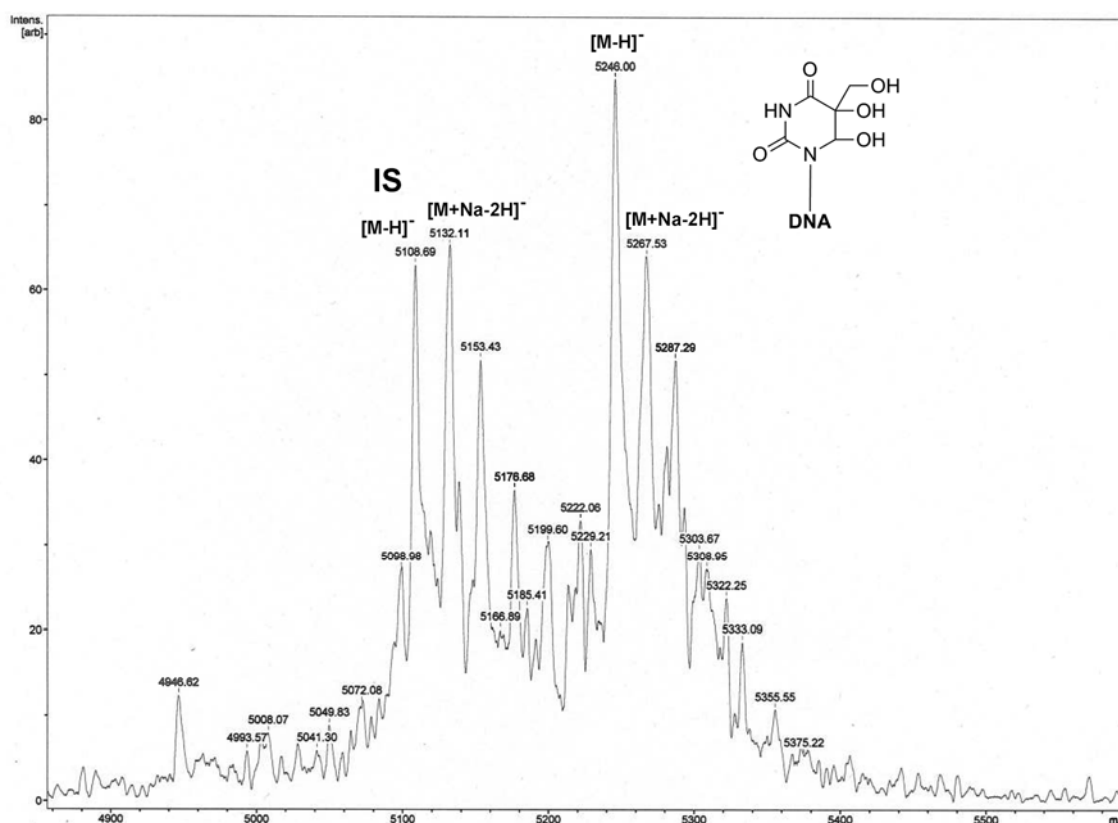

**Fig. S6** MALDI-TOF mass spectrum of the peroxotungstate **1** oxidation products of **DNA1**(<sup>hm</sup>C). Matrix = 2,4,6-trihydroxyacetophenone and diammonium hydrogen citrate. Negative mode. Dihydroxylated product: [M – H]<sup>–</sup>, C<sub>177</sub>H<sub>207</sub>N<sub>73</sub>O<sub>89</sub>P<sub>15</sub>, calc. = 5245.59, found = 5246.00. IS denotes internal standard, (dT)<sub>17</sub>.

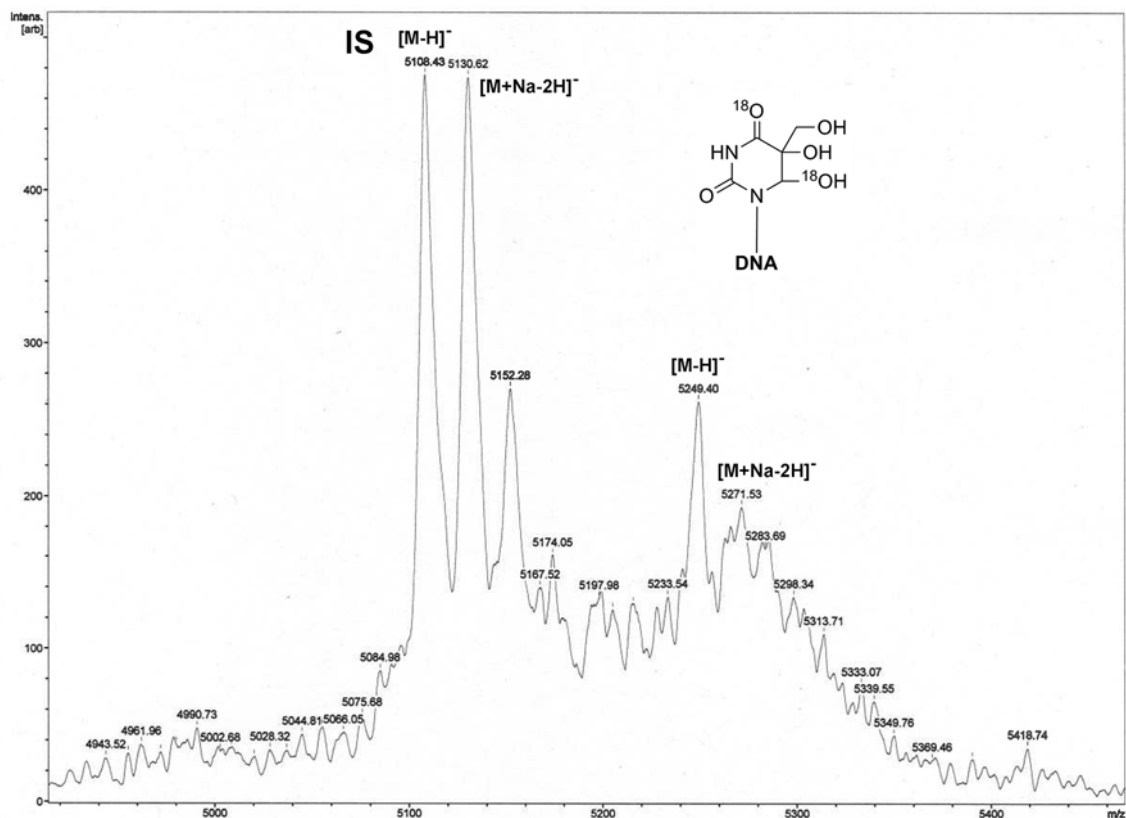

**Fig. S7** MALDI-TOF mass spectrum of the products of **DNA1**(<sup>hm</sup>C) oxidized with peroxotungstate **1** in H<sub>2</sub><sup>18</sup>O.

Matrix = 2,4,6-trihydroxyacetophenone and diammonium hydrogen citrate. Negative mode. Dihydroxylated

product: [M – H]<sup>–</sup>, C<sub>177</sub>H<sub>207</sub>N<sub>73</sub><sup>16</sup>O<sub>87</sub><sup>18</sup>O<sub>2</sub>P<sub>15</sub>, calc. = 5249.59, found = 5249.40. IS denotes internal standard, (dT)<sub>17</sub>.

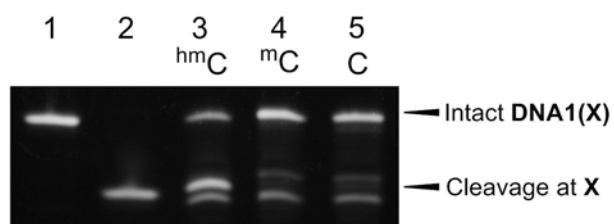

**Fig. S8** A gel image after PAGE analysis of the products after oxidation by tungstic acid in the presence of hydrogen peroxide. Lane 1 = intact DNA1(<sup>hm</sup>C), Lane 2 = 5'-Fluo-AAAAAAGp-3', and Lanes 3–5 = oxidation products of DNA1(X).

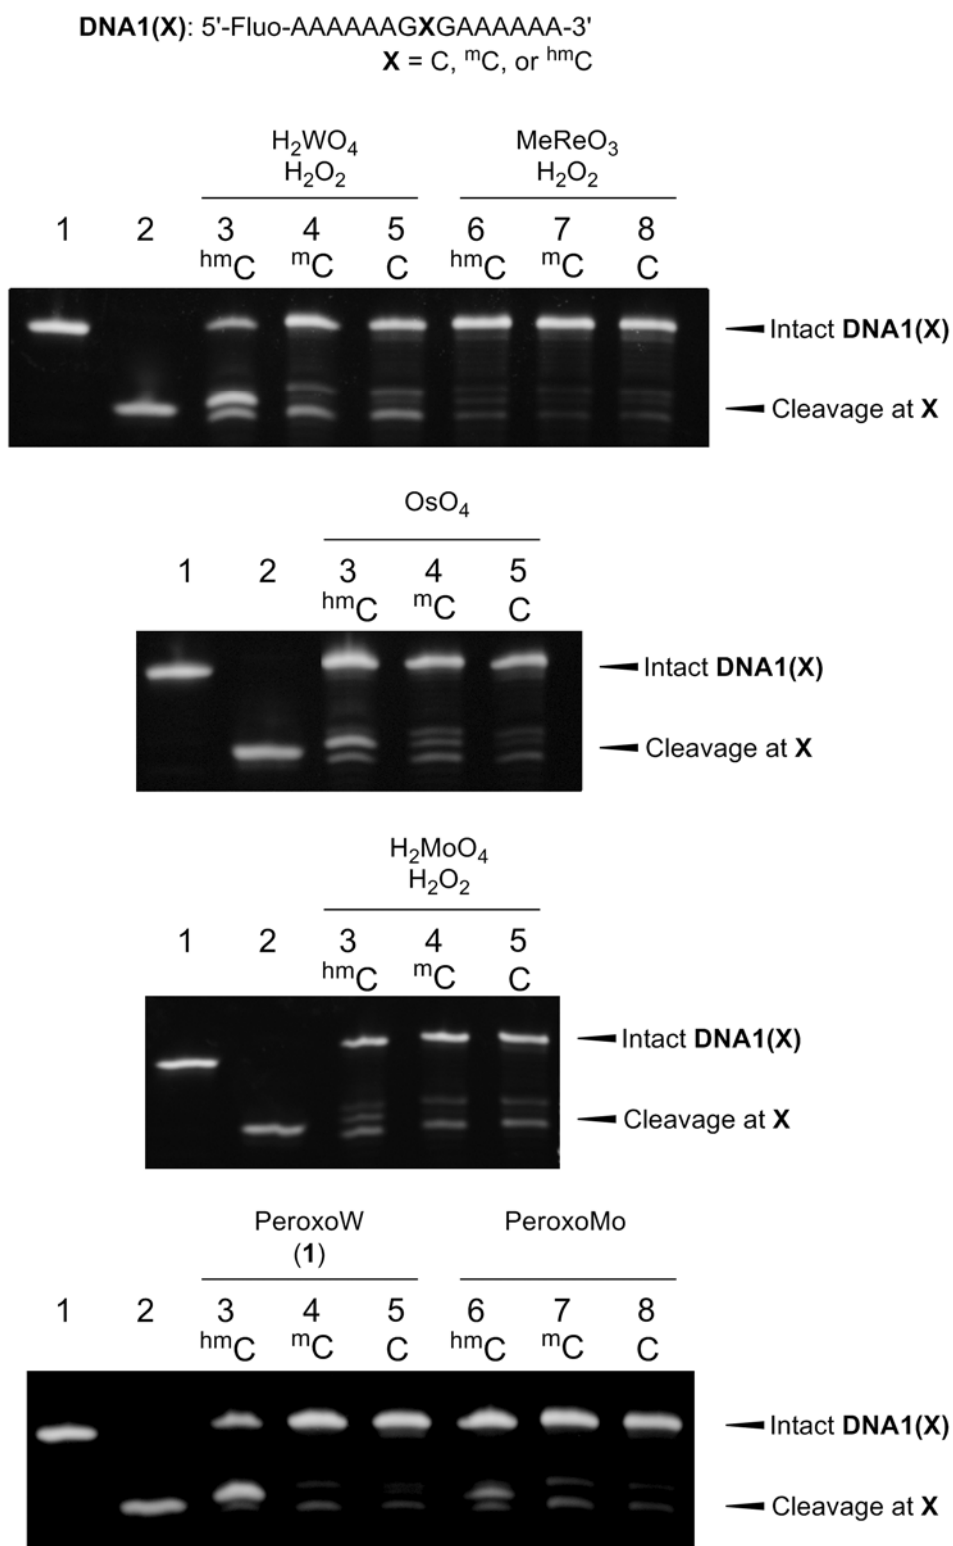

**Fig. S9** PAGE results of the oxidation products of **DNA1(X)** (X = C, <sup>m</sup>C, or <sup>hm</sup>C) using W, Os, Mo, and Re. The band intensities are summarized in Fig. 1b. Lane 1 = intact **DNA1**(<sup>hm</sup>C) and Lane 2 = 5'-fluo-AAAAAAGp-3'.

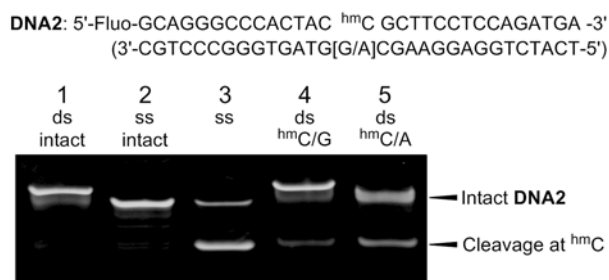

**Fig. S10** A gel image after PAGE analysis of the products after oxidation by tungstic acid in the presence of hydrogen peroxide. Lane 1, the hybrid of DNA2 and fully matched complementary DNA ( $T_m = 75\text{ }^{\circ}\text{C}$ ); lane 2, intact DNA2; lane 3, oxidation products of DNA2; lane 4, oxidation products of the hybrid of DNA2 and fully matched complementary DNA; lane 5, oxidation products of the hybrid of DNA2 and <sup>hm</sup>C/A-mismatched DNA ( $T_m = 69\text{ }^{\circ}\text{C}$ ).

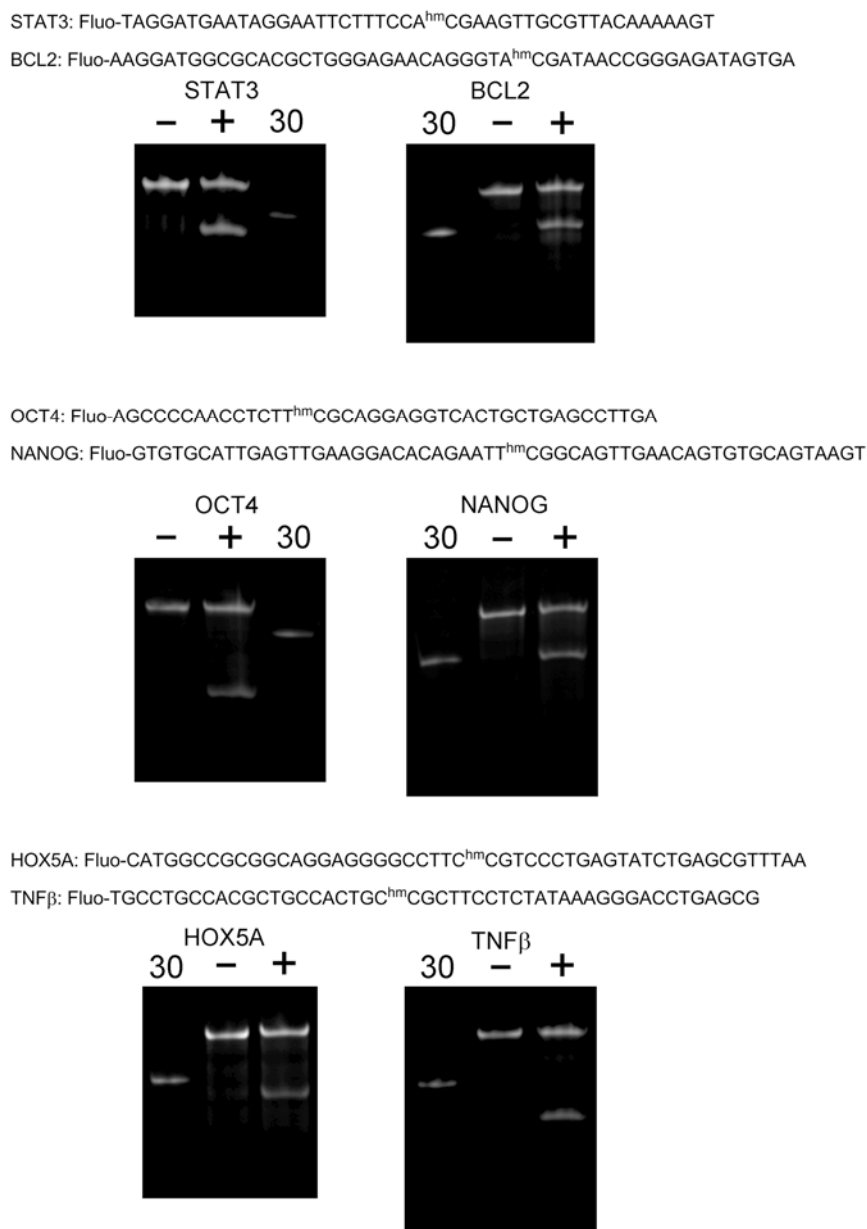

**Fig. S11** PAGE results of the oxidation products of the DNA fragments containing <sup>hm</sup>CG dinucleotides in the promoter regions of human STAT3, BCL2, OCT4, NANOG, HOX5A and TNF-β genes. Lane ‘-’, before oxidation; lane ‘+’, after oxidation and piperidine treatment; lane ‘30’, a 30-mer DNA marker (5'-Fluorescein-GCAGGGC-CCACTAC<sup>hm</sup>CGCTTCCTCCAGATGA-3').
